# Supplementary material for: Unlocking the potential of chemical-assisted water electrolysis for green hydrogen production
Source: Royal Society of Chemistry journal article supplement (doi:10.1039/d4im00163j), 2025-01-01
Supplement: d4im00163j1.pdf [file d4im00163j1.pdf]

## **Unlocking the potential of chemical-assisted water electrolysis for green hydrogen production**

Jiwoo Lee,<sup>a</sup> Sol A Lee,<sup>a,b</sup> Tae Hyung Lee,<sup>c</sup> and Ho Won Jang<sup>\*a,d</sup>

<sup>a</sup>Department of Materials Science and Engineering, Research Institute of Advanced Materials, Seoul National University, Seoul 08826, Republic of Korea

<sup>b</sup>Department of Applied Physics and Materials Science, California Institute of Technology, Pasadena 91126, United States

<sup>c</sup>School of Chemical and Biological Engineering, and Institute of Chemical Process, Seoul National University, Seoul 08826, Republic of Korea

<sup>d</sup>Advanced Institute of Convergence Technology, Seoul National University, Suwon 16229, Republic of Korea

E-mail: [hwjang@snu.ac.kr](mailto:hwjang@snu.ac.kr)

\*Corresponding author: [hwjang@snu.ac.kr](mailto:hwjang@snu.ac.kr) (H.W. Jang)

**Table 1.** Comparison of the stability of MOR electrocatalysts in various operating potentials.

| Catalysts                                 | Applied potential   | Stability (s) | Electrolyte                                                     | Ref. |
|-------------------------------------------|---------------------|---------------|-----------------------------------------------------------------|------|
| Pt–Ni/CNSs (2 : 1)                        | 0.31 V vs Ag/AgCl   | 3,600         | 0.5 M H <sub>2</sub> SO <sub>4</sub> + 1 M CH <sub>3</sub> OH   | 1    |
| PtAg/graphene                             | 0.35 V vs Ag/AgCl   | 2,000         | 0.1 M HClO <sub>4</sub> + 1.0 M CH <sub>3</sub> OH              | 2    |
| Pt/Nb-Mo <sub>2</sub> C-rGOh              | 0.29 V vs Ag/AgCl   | 3,600         | 0.5 M H <sub>2</sub> SO <sub>4</sub> + 1.0 M CH <sub>3</sub> OH | 3    |
| Pt/Mo <sub>2</sub> C-rGO                  | 0.34 V vs Ag/AgCl   | 3,600         | 0.5 M H <sub>2</sub> SO <sub>4</sub> + 1.0 M CH <sub>3</sub> OH | 3    |
| PtBi                                      | 0.35 V vs Ag/AgCl   | 1,200         | 1.0 M H <sub>2</sub> SO <sub>4</sub> + 1.0 M CH <sub>3</sub> OH | 4    |
| PtNi/PANI                                 | -0.53 V vs Ag/AgCl  | 3,600         | 0.5 M KOH + 1.0 M CH <sub>3</sub> OH                            | 5    |
| nano-NiPh/Pt                              | -0.32 V vs Ag/AgCl  | 1,500         | 0.25 M KOH + 0.25 M CH <sub>3</sub> OH                          | 6    |
| PtNi/SiO <sub>2</sub> /PANI/CPE           | -0.54 V vs Ag/AgCl  | 2,000         | 0.5 M KOH + 1 M CH <sub>3</sub> OH                              | 7    |
| p-Pt/NiCu/p-MDAB/MWCNT                    | 0.40 V vs. RHE      | 4,000         | 0.1 M NaOH + 0.5 M CH <sub>3</sub> OH                           | 8    |
| RGO/PANI/Pt/Cu                            | -0.54 V vs Ag/AgCl  | 400           | 0.5 M KOH + 1 M CH <sub>3</sub> OH                              | 7    |
| PtCo(1:9)/rGO                             | 0.378 V vs Ag/AgCl  | 1,000         | 1 M H <sub>2</sub> SO <sub>4</sub> + 2.0 M CH <sub>3</sub> OH   | 9    |
| Pd/CeO <sub>2</sub>                       | -0.192 V vs Ag/AgCl | 10,800        | 1 M KOH + 0.5 M CH <sub>3</sub> OH                              | 10   |
| Pd–Mn <sub>3</sub> O <sub>4</sub> /C      | -0.58 V vs Hg/HgO   | 28,800        | 1 M KOH + 1 M CH <sub>3</sub> OH                                | 11   |
| Pt/karst-Ni                               | -0.49 V vs. SCE     | 3,600         | 1 M KOH+1 M CH <sub>3</sub> OH                                  | 12   |
| Pt/CoSe-0.2/NiSe-nrsa/NF                  | -0.449 V vs. SCE    | 3,600         | 1 M KOH + 1 M CH <sub>3</sub> OH                                | 13   |
| PtCu <sub>2</sub> /rGO                    | 0.27 V vs. SCE      | 7,200         | 0.5 M H <sub>2</sub> SO <sub>4</sub> + 1 M CH <sub>3</sub> OH   | 14   |
| Mo@Pd/MWCNT                               | -0.55 V vs. SCE     | 1,000         | 1 M KOH + 1 M CH <sub>3</sub> OH                                | 15   |
| Ni <sub>0.6</sub> Zn <sub>0.4</sub> O/GCE | 0.445 V vs Ag/AgCl  | 36,000        | 1 M KOH + 0.1 M CH <sub>3</sub> OH                              | 16   |
| Ni@3DHPG                                  | 0.32 V vs Ag/AgCl   | 3,600         | 1 M KOH + 0.75 M CH <sub>3</sub> OH                             | 17   |
| NiO_AC@PPy/GCE                            | 0.5 V vs Ag/AgCl    | 10,000        | 1 M KOH + 0.5 M CH <sub>3</sub> OH                              | 18   |
| Ni <sub>97</sub> Bi <sub>3</sub>          | 0.31 V vs Ag/AgCl   | 43,200        | 1 M KOH + 1 M CH <sub>3</sub> OH                                | 19   |
| Fe-NF-500                                 | 1.328 V vs. RHE     | 144,000       | 1 M KOH + 1 M CH <sub>3</sub> OH                                | 20   |
| Ni-Cu/TiN                                 | 0.4 V vs Ag/AgCl    | 3,600         | 1 M KOH + 1 M CH <sub>3</sub> OH                                | 21   |
| NiCo <sub>2</sub> O <sub>4</sub> /S-rGO   | 0.12 V vs. Hg/HgO   | 36,000        | 1 M KOH + 0.5 M CH <sub>3</sub> OH                              | 22   |

**Table 2.** Comparison of the N<sub>2</sub> Faradaic efficiency of AOR electrocatalysts

| Catalysts                                        | N <sub>2</sub> Faradaic Efficiency | Applied potential   | Electrolyte                                                        | Ref. |
|--------------------------------------------------|------------------------------------|---------------------|--------------------------------------------------------------------|------|
| CuSn(OH) <sub>6</sub> nanorods                   | 84.5                               | 1.0 V vs. Hg/HgO    | 0.5 M K <sub>2</sub> SO <sub>4</sub> + 10 mM NH <sub>3</sub>       | 23   |
| Ni(OH) <sub>2</sub> /NiOOH                       | 76.6                               | 1.0 V vs. Hg/HgO    |                                                                    | 24   |
| Ni <sub>0.8</sub> Cu <sub>0.2</sub> oxyhydroxide | 2                                  | 1.53 V vs. RHE      | 0.1 M KOH + 0.5 mM (NH <sub>4</sub> ) <sub>2</sub> SO <sub>4</sub> | 25   |
| tst-Ni(OH) <sub>2</sub>                          | 66                                 | 0.6 V vs. Hg/HgO    | 1.5 M NaOH + 0.5 M NH <sub>3</sub>                                 | 26   |
| ust-Ni(OH) <sub>2</sub>                          | 30.5                               | 0.6 V vs. Hg/HgO    | 1.5 M NaOH + 0.5 M NH <sub>3</sub>                                 | 26   |
| NiCu/MnO <sub>2</sub>                            | 97.4                               | 0.6 V vs/ Hg/HgO    | 0.5 M NaOH + 55 mM NH <sub>4</sub> Cl                              | 27   |
| NiCu                                             | 53.8                               | 0.6 V vs/ Hg/HgO    | 0.5 M NaOH + 55 mM NH <sub>4</sub> Cl                              | 27   |
| NiCu <sub>3</sub> -N-C DAC catalyst              | 97.8                               | 1.5 V vs. RHE       |                                                                    | 28   |
| 500 CV-Pt                                        | 90                                 | -0.25 V vs. Ag/AgCl | 5 M KOH + 1 M NH <sub>3</sub>                                      | 29   |
| electrodeposited Pt                              | 80                                 | 0.5 V vs. RHE       | 0.5 M KOH + 0.1 M NH <sub>3</sub>                                  | 30   |
| Pt-Ir-Rh                                         | 91.8                               | Max. 1 V            | 0.2 M KOH + 21.5mM NH <sub>4</sub> OH                              | 31   |

**Table 3.** Comparison of the applied voltages of UOR electrocatalysts in various operating current density.

| Anode Catalysts                                         | Current density (mA cm <sup>-2</sup> ) |      |      |       | Electrolytes<br>(1 M KOH + xM Urea) | Ref. |
|---------------------------------------------------------|----------------------------------------|------|------|-------|-------------------------------------|------|
|                                                         | 10                                     | 20   | 50   | 100   | Urea (M)                            |      |
| Ni-WO <sub>3</sub>                                      |                                        |      |      | 1.4   | 0.33                                | 32   |
| NiFe oxalate (O-NFF)                                    |                                        |      |      | 1.409 | 0.33                                | 33   |
| Ni-S-Se/NF                                              | 1.47                                   |      |      | 1.6   | 0.5                                 | 34   |
| Rh <sub>5A</sub> -S-Co <sub>3</sub> O <sub>4</sub>      | 1.33                                   |      |      |       | 0.5                                 | 35   |
| CoS <sub>2</sub> /MoS <sub>2</sub>                      | 1.29                                   |      |      |       | 0.5                                 | 36   |
| Fe-Co <sub>0.85</sub> Se/FeCo LDH                       | 1.32                                   |      |      | 1.52  | 0.5                                 | 37   |
| Co(OH)F/NF                                              |                                        | 1.42 |      |       | 0.7                                 | 38   |
| Ni(OH) <sub>2</sub> /CuO NWs/CF                         |                                        | 1.38 |      |       | 0.5                                 | 39   |
| Fe-NiCo-BDC                                             |                                        |      |      | 1.47  | 0.5                                 | 40   |
| NCVS-3                                                  | 1.305                                  |      |      |       | 0.33                                | 41   |
| Rh-Co <sub>3</sub> S <sub>4</sub> /CoO <sub>x</sub> NTs | 1.35                                   |      | 1.48 |       | 0.5                                 | 42   |
| Ni SAs-NC                                               | 1.39                                   |      |      |       | 0.33                                | 43   |
| O-NiMoP/NF                                              | 1.36                                   |      | 1.55 |       | 0.5                                 | 44   |
| Ni <sub>2</sub> Fe(CN) <sub>6</sub>                     |                                        |      |      | 1.35  | 0.33                                | 45   |
| CoP@PNC/PCWF                                            |                                        |      | 1.5  |       | 0.5                                 | 46   |

**Table 4.** Comparison of the applied voltages of HzOR electrocatalysts in various operating current density.

| Catalysts                                                 | Current density (mA cm <sup>-2</sup> ) |       |       |       |       |      |      | Electrolytes<br>(1 M KOH + xM N <sub>2</sub> H <sub>4</sub> ) | Ref. |
|-----------------------------------------------------------|----------------------------------------|-------|-------|-------|-------|------|------|---------------------------------------------------------------|------|
|                                                           | 10                                     | 50    | 100   | 200   | 300   | 400  | 500  | N <sub>2</sub> H <sub>4</sub> (M)                             |      |
| Ni <sub>3</sub> N-Co <sub>3</sub> N<br>PNAs/NF            | 0.071                                  |       |       |       |       | 0.76 |      | 0.1                                                           | 47   |
| Fe-CoS <sub>2</sub>                                       |                                        |       |       |       |       |      | 0.95 | 0.1                                                           | 48   |
| Ni-Co-P/NF                                                |                                        |       |       | 0.88  |       |      |      | 0.1                                                           | 49   |
| CoSe <sub>2</sub>                                         | 0.164                                  |       |       |       |       |      |      | 0.5                                                           | 50   |
| Ni-C HNSA                                                 |                                        | 0.14  |       | 0.4   |       |      |      | 0.1                                                           | 51   |
| HEANC/C                                                   | 0.025                                  |       | 0.181 |       |       |      |      | 0.1                                                           | 52   |
| CoPt <sub>3</sub> /CoPtC<br>P <sub>L</sub> NC             | 0.13                                   | 0.27  | 0.49  |       |       |      |      | 0.5                                                           | 53   |
| PW-Co <sub>3</sub> N<br>NWA/NF                            | 0.028                                  |       |       | 0.277 |       |      |      | 0.1                                                           | 54   |
| Mo-<br>Ni <sub>3</sub> N/Ni/NF                            | 0.055                                  | 0.187 | 0.265 |       | 0.423 |      |      | 0.1                                                           | 55   |
| D-MoP/rGO                                                 |                                        |       | 0.74  |       |       |      |      | 0.5                                                           | 56   |
| Cu <sub>1</sub> Co <sub>2</sub> -<br>Ni <sub>2</sub> P/NF | 0.16                                   |       | 0.39  |       |       |      |      | 0.1                                                           | 57   |
| CC@WO <sub>3</sub> /Ru<br>SAs                             | 0.025                                  |       |       |       |       |      |      | 0.5                                                           | 58   |
| CC@WS <sub>2</sub> /Ru<br>SAs                             | 0.0154                                 |       |       |       |       |      |      | 0.5                                                           | 59   |
| RP-CPM                                                    | 0.023                                  |       |       |       |       |      |      | 0.3                                                           | 60   |
| Ru/PNC                                                    |                                        |       | 0.19  |       |       |      |      | 0.5                                                           | 61   |

## References

1. S. Liu, F. Dong, Z. Tang and Q. Wang, The formation of wrapping type Pt–Ni alloy on three-dimensional carbon nanosheet for electrocatalytic oxidation of methanol, *International Journal of Hydrogen Energy*, 2021, **46**, 15431–15441.
2. R. Zhang, W. Xia, W. Kang, R. Li, K. Qu, Y. Zhang, B. Chen, H. Wang, Y. Sun and H. Li, Methanol Oxidation Reaction Performance on Graphene-Supported PtAg Alloy Nanocatalyst: Contrastive Study of Electronic and Geometric Effects Induced from Ag Doping, *ChemistrySelect*, 2018, **3**, 3615–3620.
3. M. K. Sahoo and G. R. Rao, Enhanced Methanol Electro-Oxidation Activity of Pt/rGO Electrocatalyst Promoted by NbC/Mo<sub>2</sub>C Phases, *ChemistrySelect*, 2020, **5**, 3805–3814.
4. M. Yang, Catalytic activities of PtBi nanoparticles toward methanol electrooxidation in acid and alkaline media, *Journal of Power Sources*, 2013, **229**, 42–47.
5. Ultrathin-Polyaniline-Coated Pt–Ni Alloy Nanooctahedra for the Electrochemical Methanol Oxidation Reaction - Kim - 2019 - Chemistry – A European Journal - Wiley Online Library, <https://chemistry-europe.onlinelibrary.wiley.com/doi/full/10.1002/chem.201900238>, (accessed 28 November 2024).
6. Ahmed. H. Touny and Mahmoud. M. Saleh, Enhanced Methanol Oxidation on Nanoporous Nickel Phosphate Modified Platinum Electrode in Alkaline Solution, *International Journal of Electrochemical Science*, 2018, **13**, 1042–1050.
7. M. S. Lashkenari, M. Ghorbani, N. Silakhori and H. Karimi-Maleh, Enhanced electrochemical performance and stability of Pt/Ni electrocatalyst supported on SiO<sub>2</sub>-PANI nanocomposite: A combined experimental and theoretical study, *Materials Chemistry and Physics*, 2021, **262**, 124290.
8. M. A. Kamyabi, S. Jadali, L. S. Khangheshlaghi and M. K. H. Heris, A high-performance Pt-based catalyst for the methanol oxidation reaction: effect of electrodeposition mode and cocatalyst on electrocatalytic activity, *New J. Chem.*, 2023, **47**, 1209–1215.
9. R. Baronia, J. Goel, S. Tiwari, P. Singh, D. Singh, S. P. Singh and S. K. Singhal, Efficient electro-oxidation of methanol using PtCo nanocatalysts supported reduced graphene oxide matrix as anode for DMFC, *International Journal of Hydrogen Energy*, 2017, **42**, 10238–10247.
10. L. Tan, J. Yu, C. Wang, H. Wang, X. Liu, H. Gao, L. Xin, D. Liu, W. Hou and T. Zhan, Partial Sulfidation Strategy to NiFe-LDH@FeNi<sub>2</sub>S<sub>4</sub> Heterostructure Enable High-Performance Water/Seawater Oxidation, *Advanced Functional Materials*, 2022, **32**, 2200951.
11. K.-H. Ye, S.-A. Zhou, X.-C. Zhu, C.-W. Xu and P. K. Shen, Stability analysis of oxide (CeO<sub>2</sub>, NiO, Co<sub>3</sub>O<sub>4</sub> and Mn<sub>3</sub>O<sub>4</sub>) effect on Pd/C for methanol oxidation in alkaline medium, *Electrochimica Acta*, 2013, **90**, 108–111.
12. C.-S. Chen, F.-M. Pan and H.-J. Yu, Electrocatalytic activity of Pt nanoparticles on a karst-like Ni thin film toward methanol oxidation in alkaline solutions, *Applied Catalysis B: Environmental*, 2011, **104**, 382–389.
13. J. Du, S. You, X. Li, B. Tang, B. Jiang, Y. Yu, Z. Cai, N. Ren and J. Zou, In Situ Crystallization of Active NiOOH/CoOOH Heterostructures with Hydroxide Ion Adsorption Sites on Velutipes-like CoSe/NiSe Nanorods as Catalysts for Oxygen Evolution and Cocatalysts for Methanol Oxidation, *ACS Appl. Mater. Interfaces*, 2020, **12**, 686–697.

14. X. Peng, Y. Zhao, D. Chen, Y. Fan, X. Wang, W. Wang and J. Tian, One-pot synthesis of reduced graphene oxide supported PtCu catalysts with enhanced electro-catalytic activity for the methanol oxidation reaction, *Electrochimica Acta*, 2014, **136**, 292–300.
15. N. Kakati, J. Maiti, S. H. Lee and Y. S. Yoon, Core shell like behavior of PdMo nanoparticles on multiwall carbon nanotubes and their methanol oxidation activity in alkaline medium, *International Journal of Hydrogen Energy*, 2012, **37**, 19055–19064.
16. S. Wei, L. Qian, D. Jia and Y. Miao, Synthesis of 3D Flower-Like Ni<sub>0.6</sub>Zn<sub>0.4</sub>O Microspheres for Electrocatalytic Oxidation of Methanol, *Electrocatalysis*, 2019, **10**, 540–548.
17. N. Ullah, M. Xie, C. J. Oluigbo, Y. Xu, J. Xie, H. U. Rasheed and M. Zhang, Nickel and cobalt in situ grown in 3-dimensional hierarchical porous graphene for effective methanol electro-oxidation reaction, *Journal of Electroanalytical Chemistry*, 2019, **838**, 7–15.
18. L. Durai, S. S. Gunasekaran and S. Badhulika, A non-noble, low cost, multicomponent electrocatalyst based on nickel oxide decorated AC nanosheets and PPy nanowires for the direct methanol oxidation reaction, *International Journal of Hydrogen Energy*, 2022, **47**, 3099–3107.
19. A. A. Dubale, Y. Zheng, H. Wang, R. Hübner, Y. Li, J. Yang, J. Zhang, N. K. Sethi, L. He, Z. Zheng and W. Liu, High-Performance Bismuth-Doped Nickel Aerogel Electrocatalyst for the Methanol Oxidation Reaction, *Angewandte Chemie International Edition*, 2020, **59**, 13891–13899.
20. Y. Hao, D. Yu, S. Zhu, C.-H. Kuo, Y.-M. Chang, L. Wang, H.-Y. Chen, M. Shao and S. Peng, Methanol upgrading coupled with hydrogen product at large current density promoted by strong interfacial interactions, *Energy Environ. Sci.*, 2023, **16**, 1100–1110.
21. Y.-H. Mao, C.-Y. Chen, J.-X. Fu, T.-Y. Lai, F.-H. Lu and Y.-C. Tsai, Electrodeposition of nickel-copper on titanium nitride for methanol electrooxidation, *Surface and Coatings Technology*, 2018, **350**, 949–953.
22. Rebekah, C. Viswanathan and N. Ponpandian, NiCo<sub>2</sub>O<sub>4</sub> nanoparticles inlaid on sulphur and nitrogen doped and co-doped rGO sheets as efficient electrocatalysts for the oxygen evolution and methanol oxidation reactions, *Nanoscale Adv.*, 2021, **3**, 3216–3231.
23. J. Hou, Y. Cheng, H. Pan and P. Kang, CuSn Double-Metal Hydroxides for Direct Electrochemical Ammonia Oxidation to Dinitrogen, *ChemElectroChem*, 2022, **9**, e202101301.
24. Y.-J. Shih, Y.-H. Huang and C. P. Huang, *In-situ* electrochemical formation of nickel oxyhydroxide (NiOOH) on metallic nickel foam electrode for the direct oxidation of ammonia in aqueous solution, *Electrochimica Acta*, 2018, **281**, 410–419.
25. X. Jiang, D. Ying, X. Liu, M. Liu, S. Zhou, C. Guo, G. Zhao, Y. Wang and J. Jia, Identification of the role of Cu site in Ni-Cu hydroxide for robust and high selective electrochemical ammonia oxidation to nitrite, *Electrochimica Acta*, 2020, **345**, 136157.
26. Y. Jin, Y. Liu, R. Wu and J. Wang, Local tensile strain boosts the electrocatalytic ammonia oxidation reaction, *Chem. Commun.*, 2024, **60**, 1104–1107.
27. K. Nagita, Y. Yuhara, K. Fujii, Y. Katayama and M. Nakayama, Ni- and Cu-co-Intercalated Layered Manganese Oxide for Highly Efficient Electro-Oxidation of Ammonia Selective to Nitrogen, *ACS Appl. Mater. Interfaces*, 2021, **13**, 28098–28107.
28. H. Zhang, H. Wang, L. Zhou, Q. Li, X. Yang, Y. Wang, M. Zhang and Z. Wu, Efficient and highly selective direct electrochemical oxidation of ammonia to dinitrogen facilitated by NiCu diatomic site catalysts,

- Applied Catalysis B: Environmental*, 2023, **328**, 122544.
29. Y. Yang, J. Kim, H. Jo, A. Seong, M. Lee, H.-K. Min, M. Seo, Y. Choi and G. Kim, A rigorous electrochemical ammonia electrolysis protocol with in operando quantitative analysis, *J. Mater. Chem. A*, 2021, **9**, 11571–11579.
  30. J. Gwak, M. Choun and J. Lee, Alkaline Ammonia Electrolysis on Electrodeposited Platinum for Controllable Hydrogen Production, *ChemSusChem*, 2016, **9**, 403–408.
  31. E. P. Bonnin, E. J. Biddinger and G. G. Botte, Effect of catalyst on electrolysis of ammonia effluents, *Journal of Power Sources*, 2008, **182**, 284–290.
  32. L. Wang, Y. Zhu, Y. Wen, S. Li, C. Cui, F. Ni, Y. Liu, H. Lin, Y. Li, H. Peng and B. Zhang, Regulating the Local Charge Distribution of Ni Active Sites for the Urea Oxidation Reaction, *Angew Chem Int Ed*, 2021, **60**, 10577–10582.
  33. J. Kim, M. Kim, S. S. Han and K. Cho, Accessible Ni-Fe-Oxalate Framework for Electrochemical Urea Oxidation with Radically Enhanced Kinetics, *Adv Funct Materials*, 2024, **34**, 2315625.
  34. N. Chen, Y.-X. Du, G. Zhang, W.-T. Lu and F.-F. Cao, Amorphous nickel sulfoselenide for efficient electrochemical urea-assisted hydrogen production in alkaline media, *Nano Energy*, 2021, **81**, 105605.
  35. A. Kumar, X. Liu, J. Lee, B. Debnath, A. R. Jadhav, X. Shao, V. Q. Bui, Y. Hwang, Y. Liu, M. G. Kim and H. Lee, Discovering ultrahigh loading of single-metal-atoms *via* surface tensile-strain for unprecedented urea electrolysis, *Energy Environ. Sci.*, 2021, **14**, 6494–6505.
  36. C. Li, Y. Liu, Z. Zhuo, H. Ju, D. Li, Y. Guo, X. Wu, H. Li and T. Zhai, Local Charge Distribution Engineered by Schottky Heterojunctions toward Urea Electrolysis, *Advanced Energy Materials*, 2018, **8**, 1801775.
  37. H. Yu, S. Zhu, Y. Hao, Y. Chang, L. Li, J. Ma, H. Chen, M. Shao and S. Peng, Modulating Local Interfacial Bonding Environment of Heterostructures for Energy-Saving Hydrogen Production at High Current Densities, *Adv Funct Materials*, 2023, **33**, 2212811.
  38. M. Song, Z. Zhang, Q. Li, W. Jin, Z. Wu, G. Fu and X. Liu, Ni-foam supported Co(OH)F and Co-P nanoarrays for energy-efficient hydrogen production *via* urea electrolysis, *J. Mater. Chem. A*, 2019, **7**, 3697–3703.
  39. H. Sun, J. Liu, G. Chen, H. Kim, S. Kim, Z. Hu, J. Chen, S. Haw, F. Ciucci and W. Jung, Hierarchical Structure of CuO Nanowires Decorated with Ni(OH)<sub>2</sub> Supported on Cu Foam for Hydrogen Production via Urea Electrocatalysis, *Small Methods*, 2022, **6**, 2101017.
  40. M. Li, H. Sun, J. Yang, M. Humayun, L. Li, X. Xu, X. Xue, A. Habibi-Yangjeh, K. Temst and C. Wang, Mono-coordinated metallocene ligands endow metal-organic frameworks with highly efficient oxygen evolution and urea electrolysis, *Chemical Engineering Journal*, 2022, **430**, 132733.
  41. Z. Ji, Y. Song, S. Zhao, Y. Li, J. Liu and W. Hu, Pathway Manipulation via Ni, Co, and V Ternary Synergism to Realize High Efficiency for Urea Electrocatalytic Oxidation, *ACS Catal.*, 2022, **12**, 569–579.
  42. D. C. Nguyen, T. L. L. Doan, S. Prabhakaran, D. H. Kim, N. H. Kim and J. H. Lee, Rh single atoms/clusters confined in metal sulfide/oxide nanotubes as advanced multifunctional catalysts for green and energy-saving hydrogen productions, *Applied Catalysis B: Environmental*, 2022, **313**, 121430.
  43. H. Jiang, J. Xia, L. Jiao, X. Meng, P. Wang, C.-S. Lee and W. Zhang, Ni single atoms anchored on N-doped carbon nanosheets as bifunctional electrocatalysts for Urea-assisted rechargeable Zn-air batteries, *Applied*



- Catalysis B: Environmental*, 2022, **310**, 121352.
44. H. Jiang, M. Sun, S. Wu, B. Huang, C. Lee and W. Zhang, Oxygen-Incorporated NiMoP Nanotube Arrays as Efficient Bifunctional Electrocatalysts For Urea-Assisted Energy-Saving Hydrogen Production in Alkaline Electrolyte, *Adv Funct Materials*, 2021, **31**, 2104951.
  45. S.-K. Geng, Y. Zheng, S.-Q. Li, H. Su, X. Zhao, J. Hu, H.-B. Shu, M. Jaroniec, P. Chen, Q.-H. Liu and S.-Z. Qiao, Nickel ferrocyanide as a high-performance urea oxidation electrocatalyst, *Nat Energy*, 2021, **6**, 904–912.
  46. J. Kang, F. Yang, C. Sheng, H. Xu, J. Wang, Y. Qing, Y. Wu and X. Lu, CoP Nanoparticle Confined in P, N Co-Doped Porous Carbon Anchored on P-Doped Carbonized Wood Fibers with Tailored Electronic Structure for Efficient Urea Electro-Oxidation, *Small*, 2022, **18**, 2200950.
  47. Q. Qian, J. Zhang, J. Li, Y. Li, X. Jin, Y. Zhu, Y. Liu, Z. Li, A. El-Harairy, C. Xiao, G. Zhang and Y. Xie, Artificial Heterointerfaces Achieve Delicate Reaction Kinetics towards Hydrogen Evolution and Hydrazine Oxidation Catalysis, *Angew Chem Int Ed*, 2021, **60**, 5984–5993.
  48. X. Liu, J. He, S. Zhao, Y. Liu, Z. Zhao, J. Luo, G. Hu, X. Sun and Y. Ding, Self-powered H<sub>2</sub> production with bifunctional hydrazine as sole consumable, *Nat Commun*, 2018, **9**, 4365.
  49. L. Zhu, J. Huang, G. Meng, T. Wu, C. Chen, H. Tian, Y. Chen, F. Kong, Z. Chang, X. Cui and J. Shi, Active site recovery and N-N bond breakage during hydrazine oxidation boosting the electrochemical hydrogen production, *Nat Commun*, 2023, **14**, 1997.
  50. J. Zhang, H. Wang, Y. Tian, Y. Yan, Q. Xue, T. He, H. Liu, C. Wang, Y. Chen and B. Y. Xia, Anodic Hydrazine Oxidation Assists Energy-Efficient Hydrogen Evolution over a Bifunctional Cobalt Perselenide Nanosheet Electrode, *Angew Chem Int Ed*, 2018, **57**, 7649–7653.
  51. Y. Zhu, J. Zhang, Q. Qian, Y. Li, Z. Li, Y. Liu, C. Xiao, G. Zhang and Y. Xie, Dual Nanoislands on Ni/C Hybrid Nanosheet Activate Superior Hydrazine Oxidation-Assisted High-Efficiency H<sub>2</sub> Production, *Angew Chem Int Ed*, 2022, **61**, e202113082.
  52. G. Feng, Y. Pan, D. Su and D. Xia, Constructing Fully-Active and Ultra-Active Sites in High-Entropy Alloy Nanoclusters for Hydrazine Oxidation-Assisted Electrolytic Hydrogen Production, *Advanced Materials*, 2024, **36**, 2309715.
  53. Z. Li, W. Wang, Q. Qian, Y. Zhu, Y. Feng, Y. Zhang, H. Zhang, M. Cheng and G. Zhang, Magic hybrid structure as multifunctional electrocatalyst surpassing benchmark Pt/C enables practical hydrazine fuel cell integrated with energy-saving H<sub>2</sub> production, *eScience*, 2022, **2**, 416–427.
  54. Y. Liu, J. Zhang, Y. Li, Q. Qian, Z. Li, Y. Zhu and G. Zhang, Manipulating dehydrogenation kinetics through dual-doping Co<sub>3</sub>N electrode enables highly efficient hydrazine oxidation assisting self-powered H<sub>2</sub> production, *Nat Commun*, 2020, **11**, 1853.
  55. Y. Liu, J. Zhang, Y. Li, Q. Qian, Z. Li and G. Zhang, Realizing the Synergy of Interface Engineering and Chemical Substitution for Ni<sub>3</sub>N Enables its Bifunctionality Toward Hydrazine Oxidation Assisted Energy-Saving Hydrogen Production, *Adv Funct Materials*, 2021, **31**, 2103673.
  56. Y. Gao, Q. Wang, T. He, J.-Y. Zhang, H. Sun, B. Zhao, B. Y. Xia, Y. Yan and Y. Chen, Defective crystalline molybdenum phosphides as bifunctional catalysts for hydrogen evolution and hydrazine oxidation reactions during water splitting, *Inorg. Chem. Front.*, 2019, **6**, 2686–2695.
  57. C. Feng, M. Lv, J. Shao, H. Wu, W. Zhou, S. Qi, C. Deng, X. Chai, H. Yang, Q. Hu and C. He, Lattice

- Strain Engineering of Ni<sub>2</sub>P Enables Efficient Catalytic Hydrazine Oxidation-Assisted Hydrogen Production, *Advanced Materials*, 2023, **35**, 2305598.
58. J. Li, C. Zhang, C. Zhang, H. Ma, Y. Yang, Z. Guo, Y. Wang and H. Ma, Electronic configuration of single ruthenium atom immobilized in urchin-like tungsten trioxide towards hydrazine oxidation-assisted hydrogen evolution under wide pH media, *Chemical Engineering Journal*, 2022, **430**, 132953.
59. J. Li, Y. Li, J. Wang, C. Zhang, H. Ma, C. Zhu, D. Fan, Z. Guo, M. Xu, Y. Wang and H. Ma, Elucidating the Critical Role of Ruthenium Single Atom Sites in Water Dissociation and Dehydrogenation Behaviors for Robust Hydrazine Oxidation-Boosted Alkaline Hydrogen Evolution, *Adv Funct Materials*, 2022, **32**, 2109439.
60. Y. Li, J. Zhang, Y. Liu, Q. Qian, Z. Li, Y. Zhu and G. Zhang, Partially exposed RuP<sub>2</sub> surface in hybrid structure endows its bifunctionality for hydrazine oxidation and hydrogen evolution catalysis, *Sci. Adv.*, 2020, **6**, eabb4197.
61. X. Guan, Q. Wu, H. Li, S. Zeng, Q. Yao, R. Li, H. Chen, Y. Zheng and K. Qu, Identifying the roles of Ru single atoms and nanoclusters for energy-efficient hydrogen production assisted by electrocatalytic hydrazine oxidation, *Applied Catalysis B: Environmental*, 2023, **323**, 122145.
